# Supplementary material for: A GIS-based Multi-Criteria Decision Framework for Landfill Site Selection in Bilaspur and Gaurela-Pendra- Marwahi Districts, Chhattisgarh: Integrating AHP and MIF
Source: Research Square preprint supplement (doi:10.21203/rs.3.rs-4329339/v1), 2024-06-04
Supplement: Supplementary file 1 [file 907b2b1bbc5c8db3a0e8b181.docx]

| Parameters | Data Type | Data Source | Product | Source Location |
| --- | --- | --- | --- | --- |
| Airport | Vector | Digitized in ArcMap 9.3 | AP | From Google Map |
| Cropland | Raster | ArcGIS Living Atlas of the world | CL | https://livingatlas.arcgis.com/landcover/ |
| Digital Elevation Model | Raster | Indian Geo-Platform of ISRO | DEM | https://bhuvan.nrsc.gov.in/bhuvan_links.php |
| Geology | Raster | Geological Survey of India | G | https://bhukosh.gsi.gov.in/ |
| Human Settlement | Vector | Digitized in ArcMap 9.3 | HS | From Base Map in ArcGIS 9.3 |
| Industrial Point | Vector | Digitized in ArcMap 9.3 | IP | From Google Map |
| Land Use/Land Cover | Raster | ArcGIS Living Atlas of the World | LU/LC | https://livingatlas.arcgis.com/landcover/ |
| Power Line | Vector | IGISMAP | PL | https://map.igismap.com/gis-data/india/powerline |
| Precipitation | Raster | Data Access Viewer - NASA POWER | PR | https://power.larc.nasa.gov/data-access-viewer/ |
| Rail Network | Vector | Digitized in ArcMap 9.3 | RN | From Base Map in ArcGIS 9.3 |
| River Line | Vector | DEM | RL | https://bhuvan.nrsc.gov.in/bhuvan_links.php |
| Road Network | Vector | Digitized in ArcMap 9.3 | RD | From Base Map in ArcGIS 9.3 |
| Slope | Raster | DEM | SL | https://bhuvan.nrsc.gov.in/bhuvan_links.php |
| Sub-stations Point | Vector | Digitized in ArcMap 9.3 | SP | From Google Map |
| Soil Type | Raster | FAO-UNESCO Soil Map of the World India | ST | https://www.fao.org/soils-portal/data-hub/soil-maps-and-databases/faounesco-soil-map-of-the-world/en/ |
