# Supplementary material for: A GIS-based Multi-Criteria Decision Framework for Landfill Site Selection in Bilaspur and Gaurela-Pendra- Marwahi Districts, Chhattisgarh: Integrating AHP and MIF
Source: Research Square preprint supplement (doi:10.21203/rs.3.rs-4329339/v1), 2024-06-04
Supplement: Supplementary file 2 [file 90df378d0aa031fb94720ead.docx]

| Criteria | Major Effect | Minor Effect | Relative Effect | Purposed Weight of MIF | Purposed Weight AHP |
| --- | --- | --- | --- | --- | --- |
| Road Network | 1+1+1+1 | 0.5+0.5+0.5 | 5.5 | 14.66 | 0.17 |
| Human Settlement | 1+1+1+1 | 0.5 | 4.5 | 12.00 | 0.12 |
| Soil | 1+1+1 | 0.5+0.5 | 4 | 10.67 | 0.10 |
| LU/LC | 1+1+1 | 0.5+0.5 | 4 | 10.67 | 0.09 |
| Geology | 1 | 0.5+0.5+0.5+0.5 | 3 | 8.00 | 0.08 |
| Industries | 1+1 | 0.5+0.5 | 3 | 8.00 | 0.08 |
| Slope | 1+1 | 0.5 | 2.5 | 6.67 | 0.06 |
| Powerline | 1 | 0.5+0.5 | 2 | 5.33 | 0.06 |
| Precipitation | 1 | 0.5+0.5 | 2 | 5.33 | 0.06 |
| Substation | 1 | 0.5 | 1.5 | 4.00 | 0.04 |
| Railway Line | 0 | 0.5+0.5+0.5 | 1.5 | 4.00 | 0.03 |
| Elevation | 1 | 0.5 | 1.5 | 4.00 | 0.03 |
| StreamLine | 0 | 0.5+0.5 | 1 | 2.67 | 0.03 |
| Cropland | 0 | 0.5+0.5 | 1 | 2.67 | 0.03 |
| Airport | 0 | 0.5 | 0.5 | 1.33 | 0.03 |
| Total |  |  | 37.5 | ∑100 | ∑1 |
