# Supplementary material for: A GIS-based Multi-Criteria Decision Framework for Landfill Site Selection in Bilaspur and Gaurela-Pendra- Marwahi Districts, Chhattisgarh: Integrating AHP and MIF
Source: Research Square preprint supplement (doi:10.21203/rs.3.rs-4329339/v1), 2024-06-04
Supplement: Supplementary file 3 [file d0ab1572826705dd9abb444e.docx]

| Intensity of importance | Definition |  |
| --- | --- | --- |
| 1 | Equal importance |  |
| 3 | Moderate importance of the first element over the second element in the pair |  |
| 5 | Strong or essential importance of the first element over the second element in the pair |  |
| 7 | Very strong importance of the first element over the second element in the pair |  |
| 9 | Extreme importance of the first element over the second element in the pair |  |
| 2,4,6,8 | Intermediate value between two adjacent judgments |  |
| Reciprocals of the above non-zero numbers | The inverse of the importance (e.g., a value of means that the second element has a very strong importance over the first element in the pair) |  |
